# Supplementary material for: Atypical Response Patterns in Renal Cell Carcinoma Treated with Immune Checkpoint Inhibitors—Navigating the Radiologic Potpourri
Source: MDPI journal article supplement (doi:10.3390/cancers13071689), 2021-04-02
Supplement: s1 [file s1]

## Supplementary Materials:

The detailed survival analyses are given here.

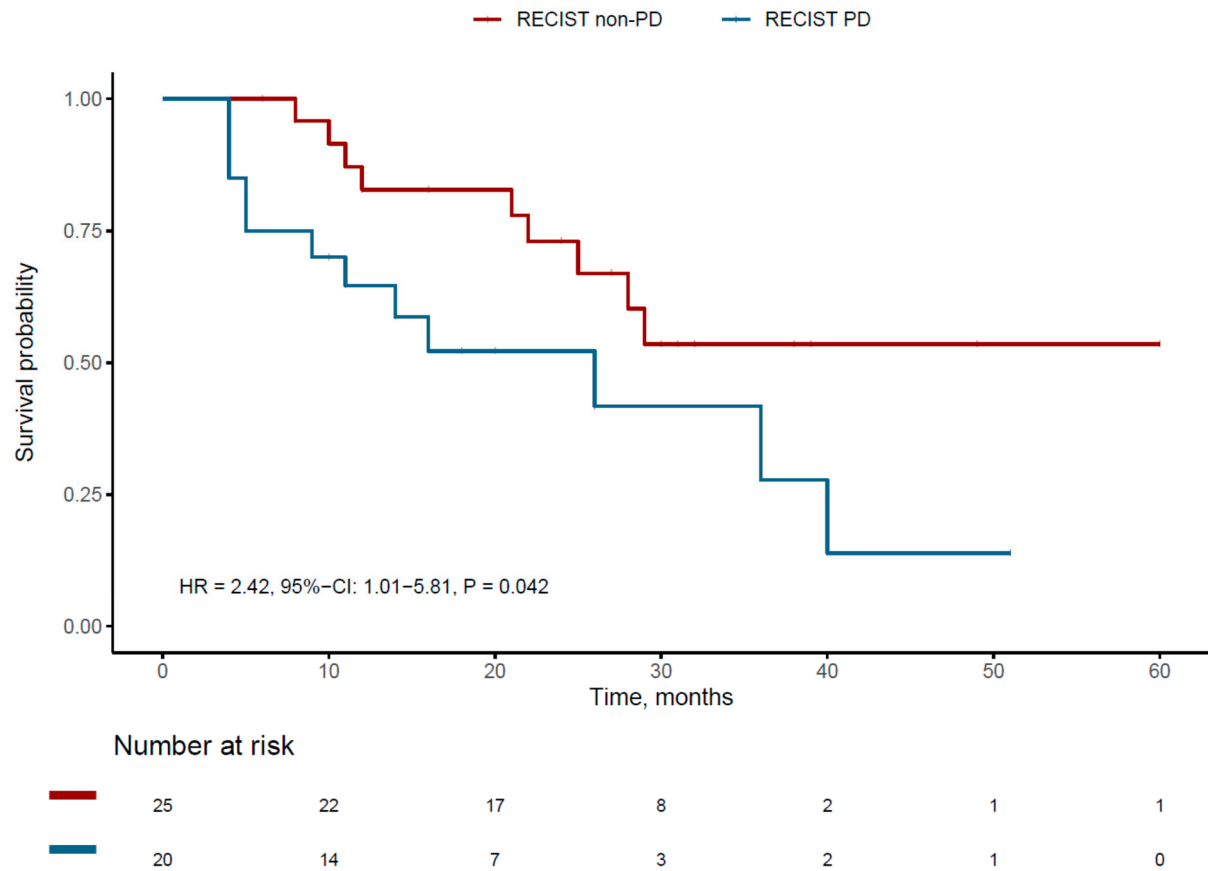

**Figure S1.** Overall survival by RECIST non-progressive disease versus progressive disease (PD).

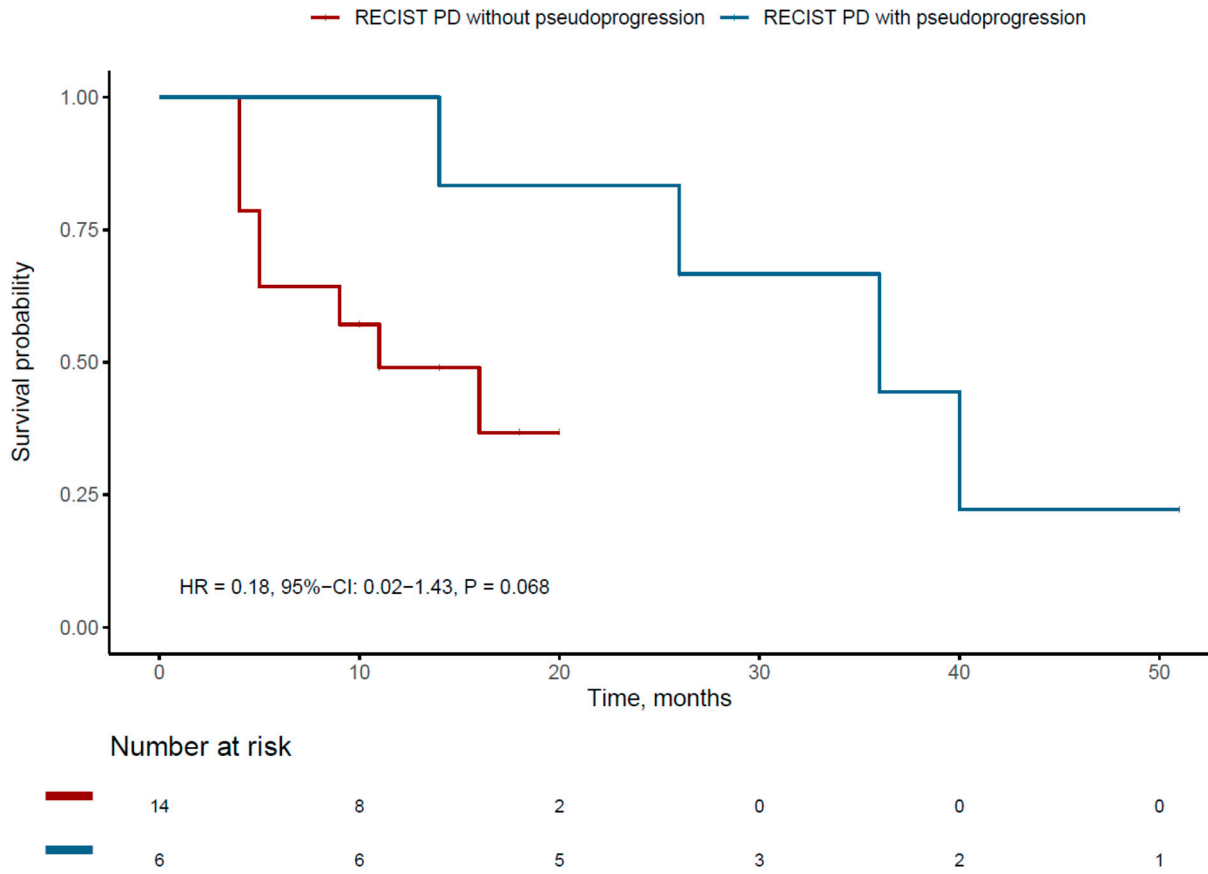

**Figure S2.** Overall survival in RECIST PD patients by presence or absence of pseudoprogression.

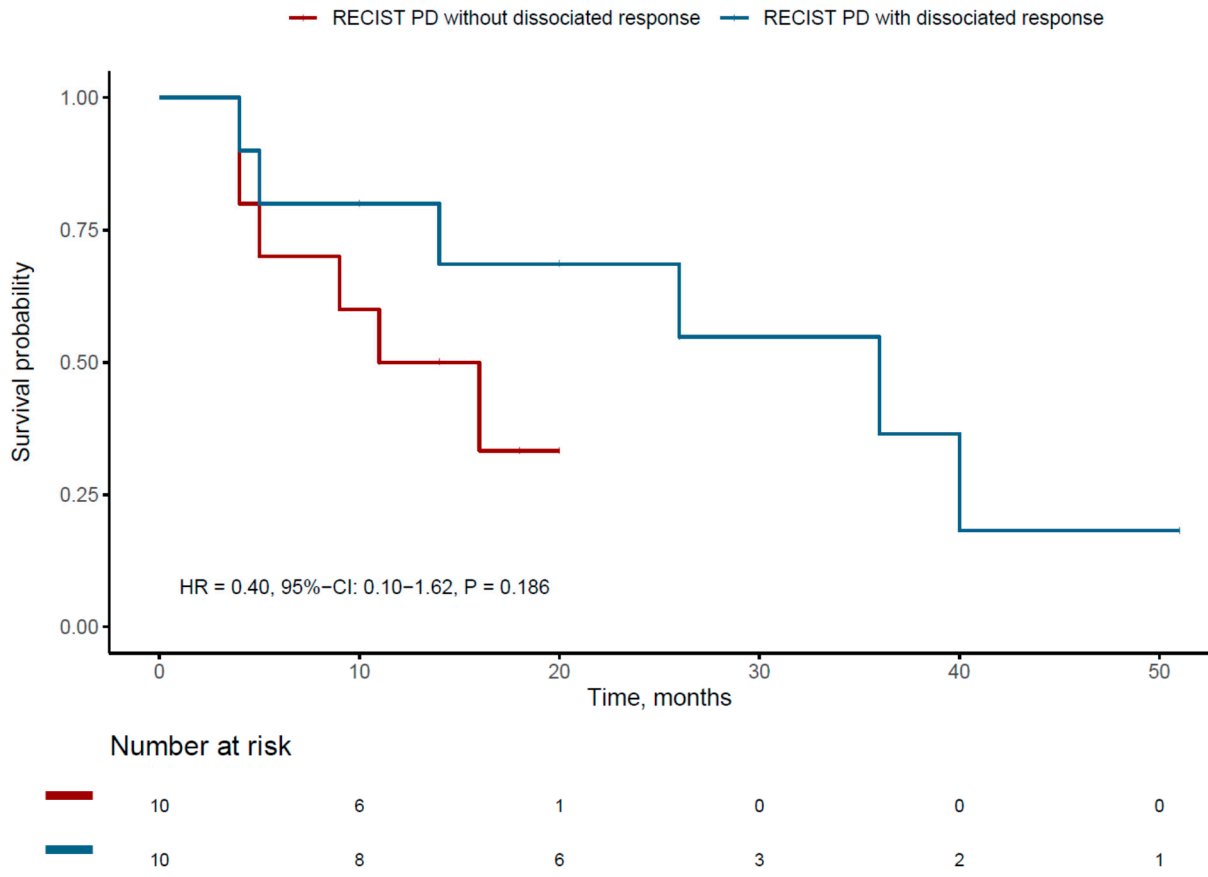

**Figure S3.** Overall survival in RECIST PD patients by presence or absence of dissociated response.

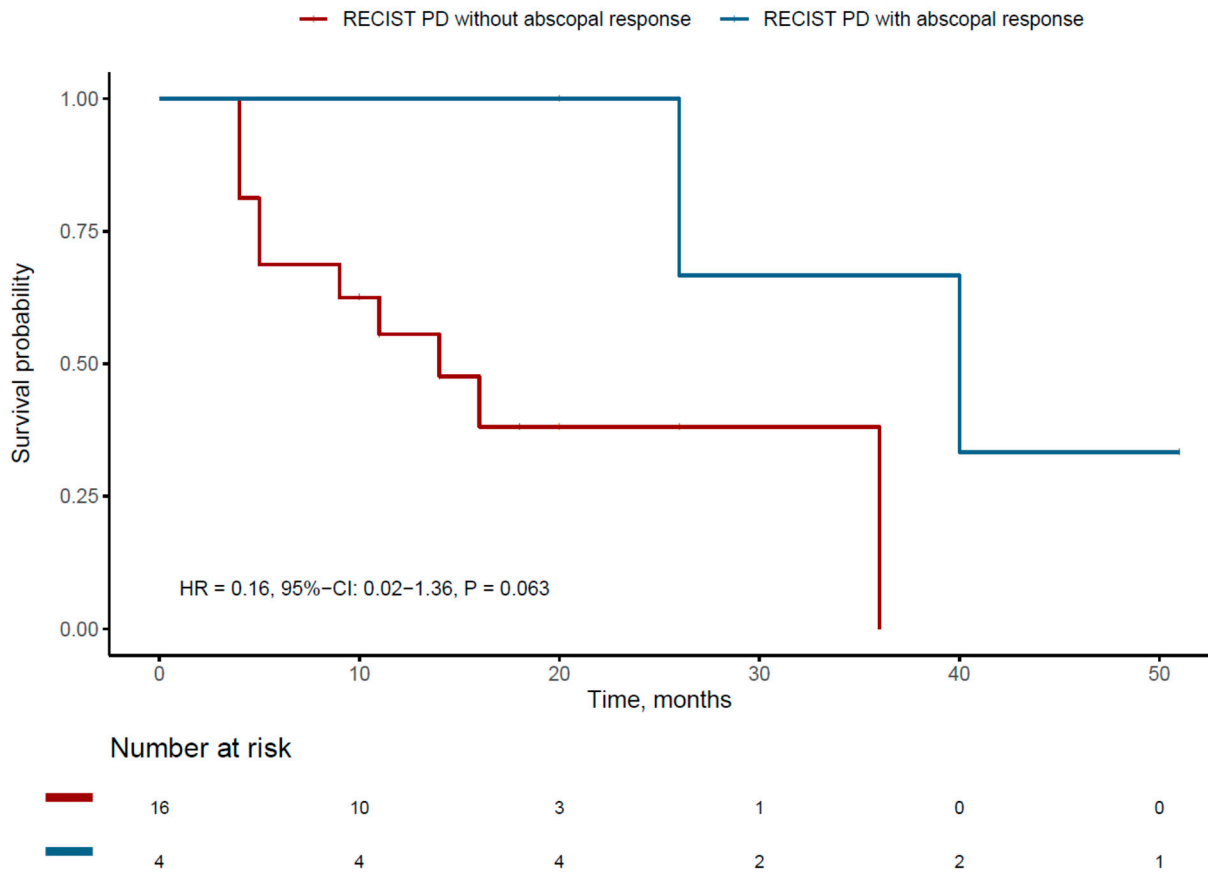

**Figure S4.** Overall survival in RECIST PD patients by presence or absence of abscopal response.

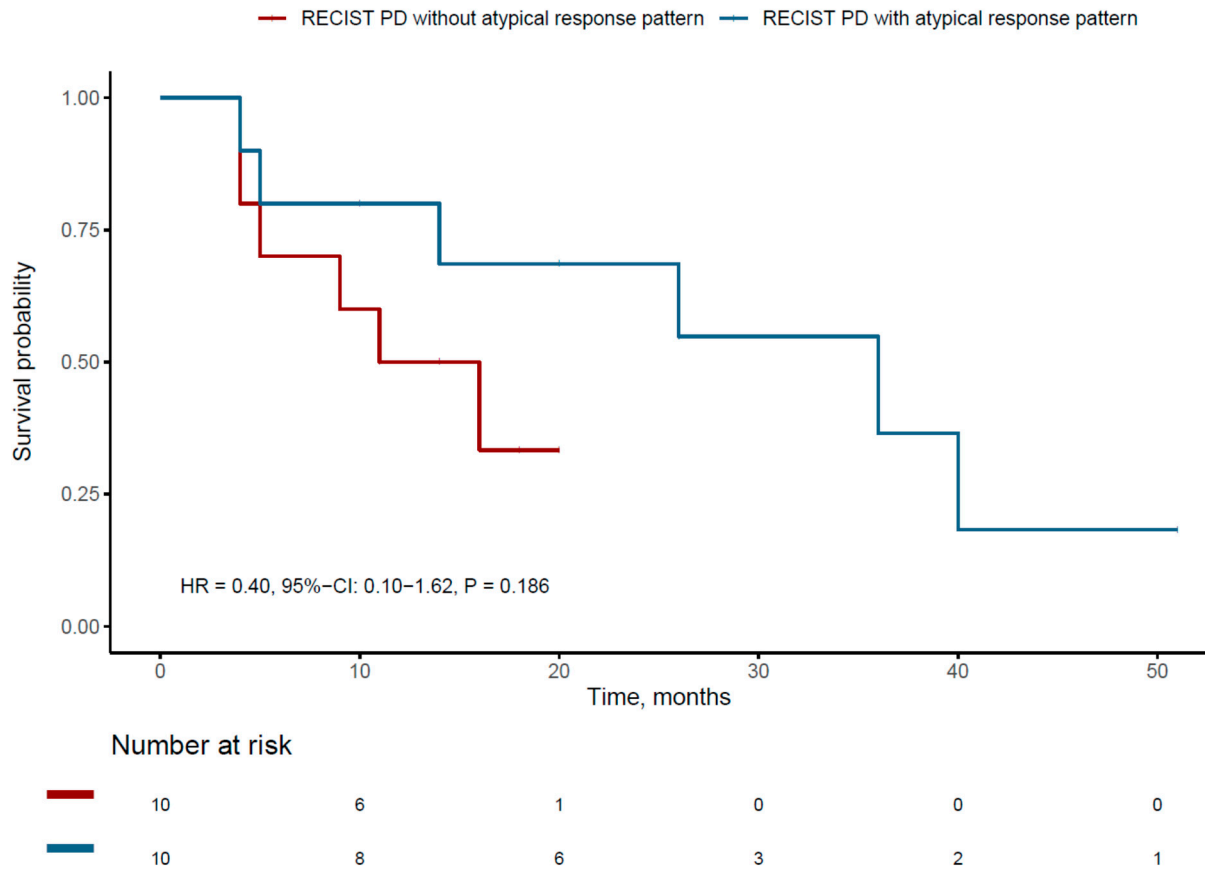

**Figure S5.** Overall survival in RECIST PD patients by presence or absence of any atypical response pattern.

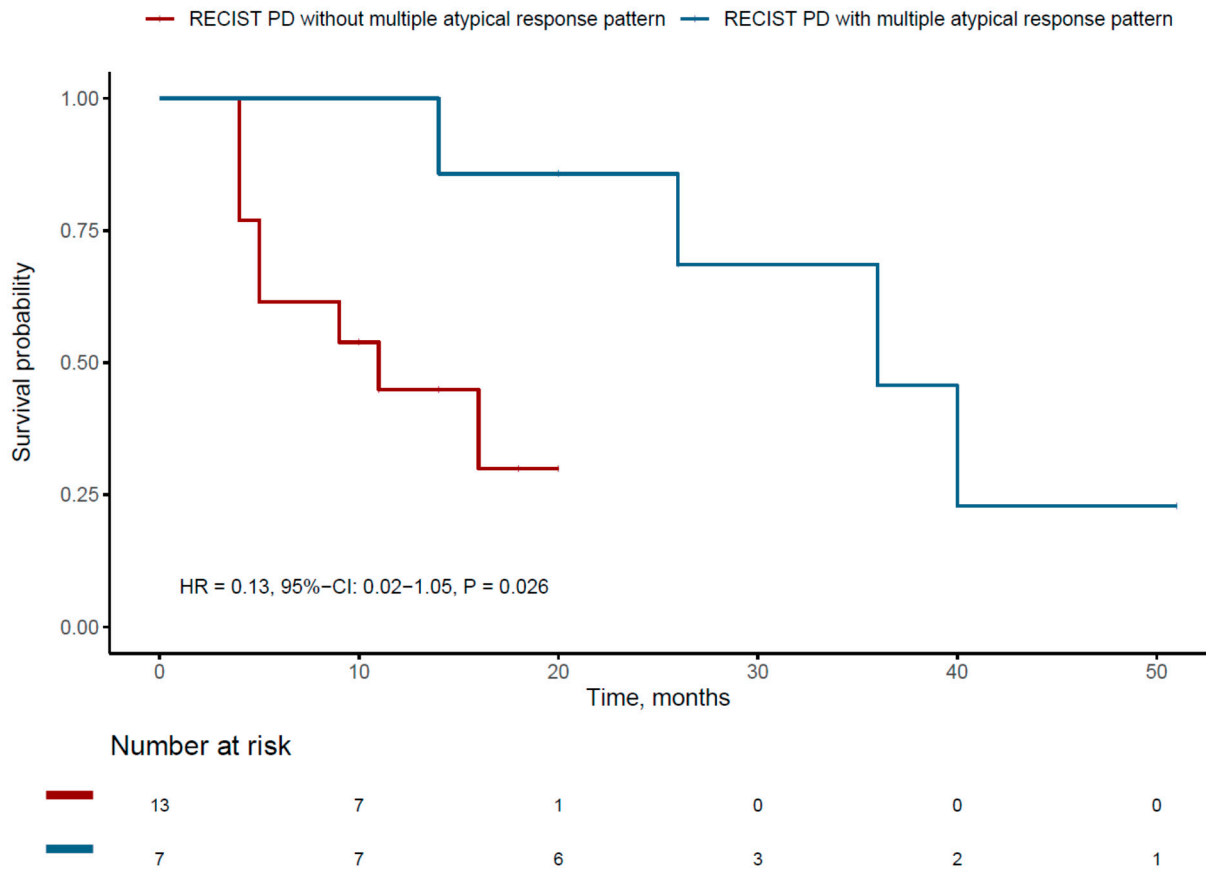

**Figure S6.** Overall survival in RECIST PD patients by presence or absence of multiple atypical response patterns.
